# Supplementary material for: Contributions of tropodithietic acid and biofilm formation to the probiotic activity of Phaeobacter inhibens
Source: PubMed Central journal article supplement (PMC4700733; doi:10.1186/s12866-015-0617-z), 2016-01-05

**Additional File 1.** Electrospray ionization MS of purified TDA, structure shown on right, in the positive ion mode. The spectrum shows expected losses of H<sub>2</sub>O and CO<sub>2</sub>H.

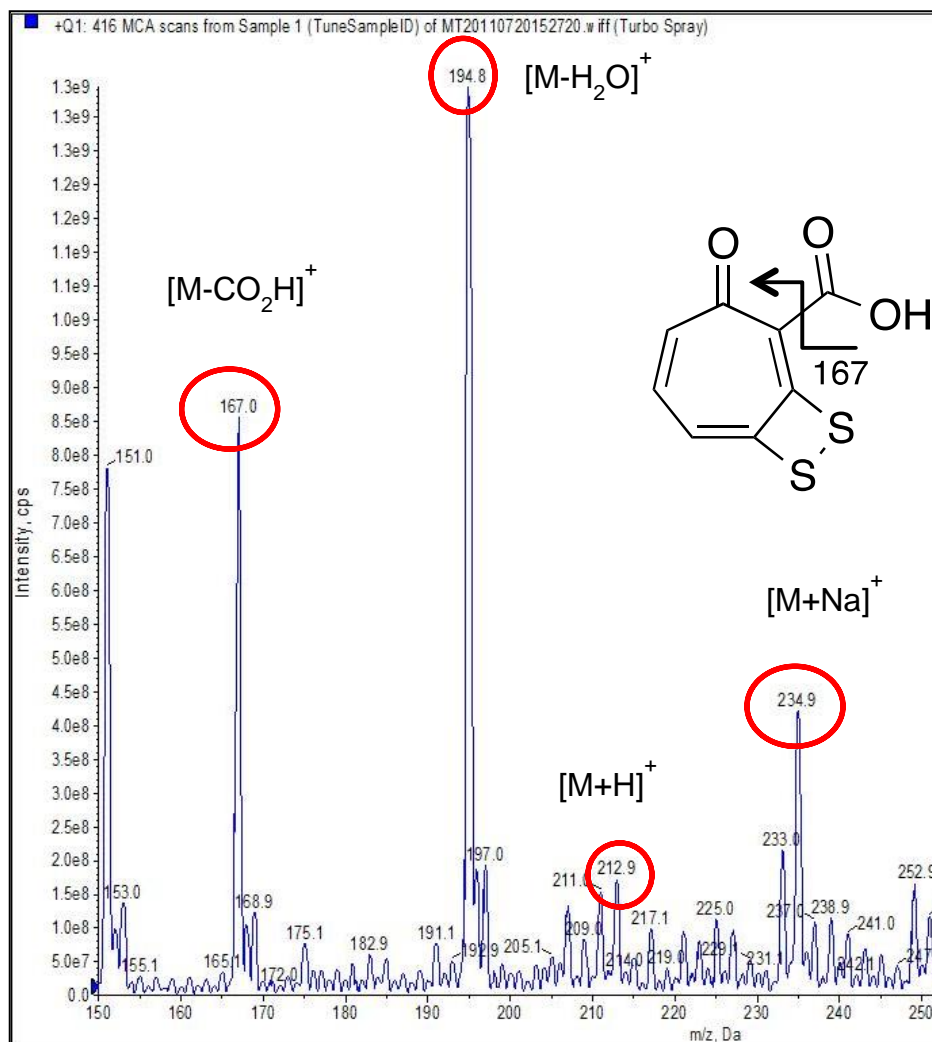

Supplement: 12866_2015_617_MOESM1_ESM.pdf [file 12866_2015_617_MOESM1_ESM.pdf]
