# Supplementary material for: Contributions of tropodithietic acid and biofilm formation to the probiotic activity of Phaeobacter inhibens
Source: PubMed Central journal article supplement (PMC4700733; doi:10.1186/s12866-015-0617-z), 2016-01-05

**Additional File 2.**  $^1\text{H}$  NMR spectrum (500 MHz,  $\text{C}_6\text{D}_6$ ) for purified TDA. The spectrum is expanded to show the aromatic region of interest. Spectrum was referenced to residual benzene resonance at 7.16 ppm.

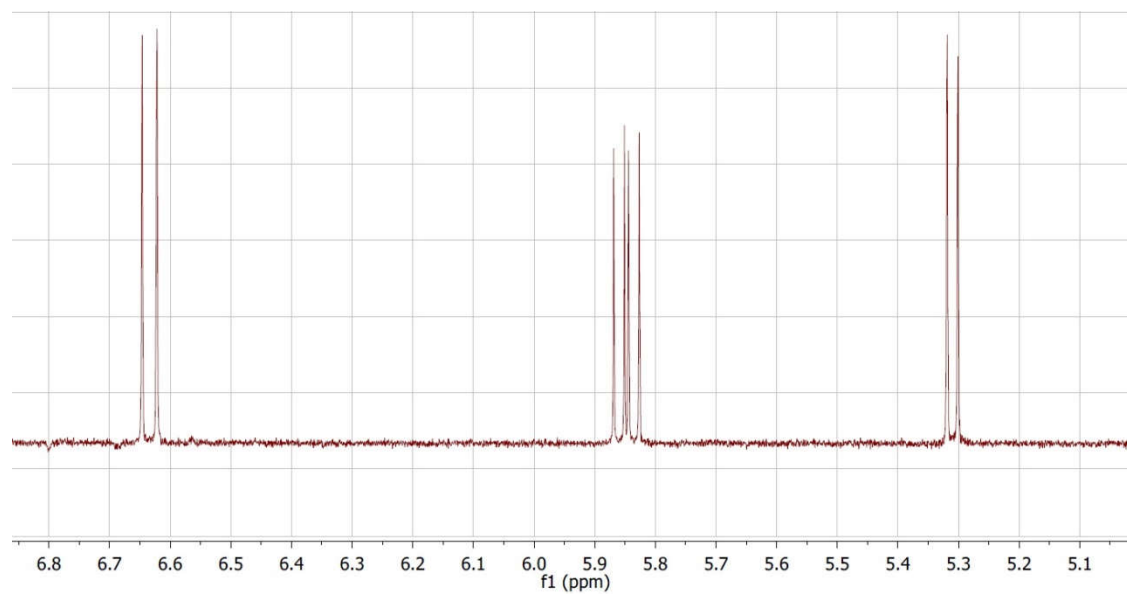

Supplement: 12866_2015_617_MOESM2_ESM.pdf [file 12866_2015_617_MOESM2_ESM.pdf]
