# Supplementary material for: Contributions of tropodithietic acid and biofilm formation to the probiotic activity of Phaeobacter inhibens
Source: PubMed Central journal article supplement (PMC4700733; doi:10.1186/s12866-015-0617-z), 2016-01-05
Supplement: 12866_2015_617_MOESM3_ESM.pdf [file 12866_2015_617_MOESM3_ESM.pdf]

**Additional File 3.**  $^1\text{H}$  NMR spectroscopic data of purified TDA from *P. inhibens*. Comparison is provided to data published by Liang (2003).

| <i>H</i> | $\delta_{\text{H}}, m, J=\text{Hz}$ literature (Liang 2003) | $\delta_{\text{H}} m, J=\text{Hz}$ experimental |
|----------|-------------------------------------------------------------|-------------------------------------------------|
| 5        | 1H, 5.38, d, J=8.9                                          | 1H, 5.36, d J=9.0                               |
| 6        | 1H, 5.90, dd, J=12.2, 8.9                                   | 1H, 5.89, dd, J=12.1, 8.8                       |
| 7        | 1H, 6.63, d J=12.2                                          | 1H, 6.67, d, J=12.5                             |
| 8        | 1H, 16.80 s                                                 | 1H, 16.77 s                                     |
