# Supplementary material for: Contributions of tropodithietic acid and biofilm formation to the probiotic activity of Phaeobacter inhibens
Source: PubMed Central journal article supplement (PMC4700733; doi:10.1186/s12866-015-0617-z), 2016-01-05

**Additional File 4.** A) Reversed-phase HPLC chromatograms of ethyl acetate extracts from *Phaeobacter* S4 mutant strains. B) Quantification of biofilm formation by measuring OD580 of crystal violet dye attached to the cells forming biofilms on glass tubes at 27°C under static condition. The data presented are average of two independent experiments and each independent experiment has three replicates.

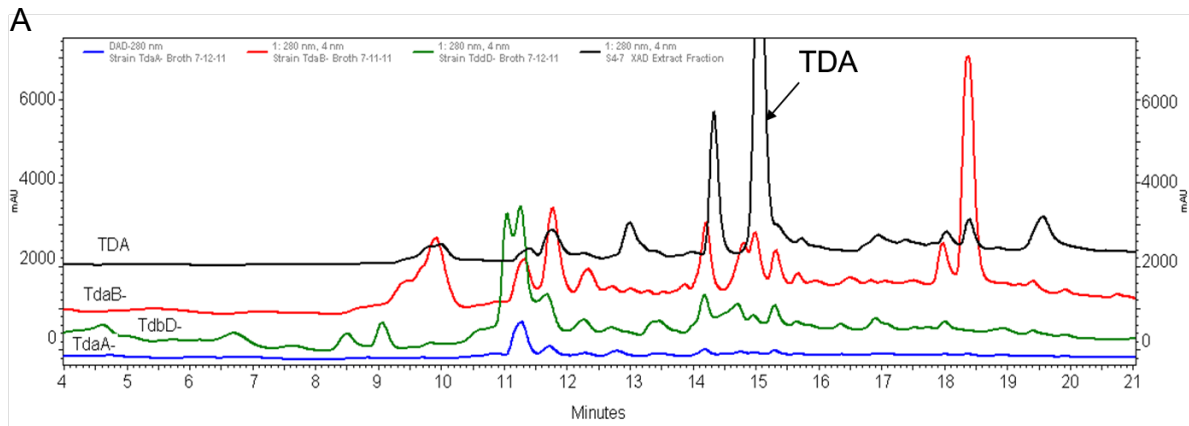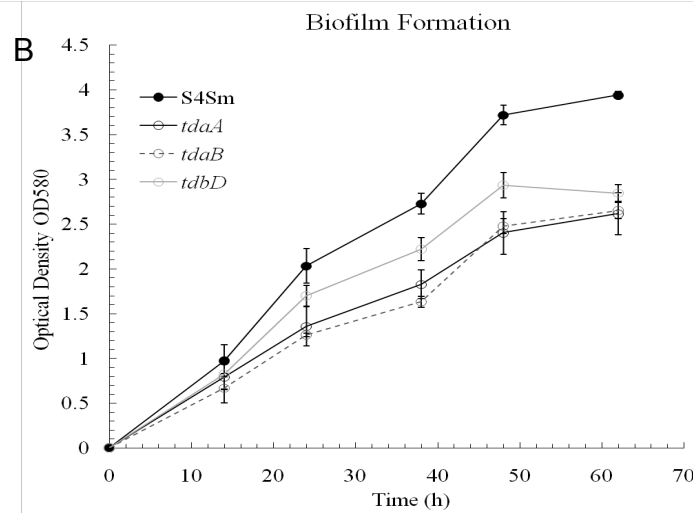

Supplement: 12866_2015_617_MOESM4_ESM.pdf [file 12866_2015_617_MOESM4_ESM.pdf]
