# Supplementary material for: Contributions of tropodithietic acid and biofilm formation to the probiotic activity of Phaeobacter inhibens
Source: PubMed Central journal article supplement (PMC4700733; doi:10.1186/s12866-015-0617-z), 2016-01-05

**Additional File 5.** Growth curve of Phaeobacter S4 strains under different conditions (static vs. shaking). Overnight culture of Phaeobacter cells were grown in YP30 media and then back-diluted into fresh YP30 1:1,000 dilution. Samples were taken at the indicated times and OD600 value were measured by a spectroscopy.

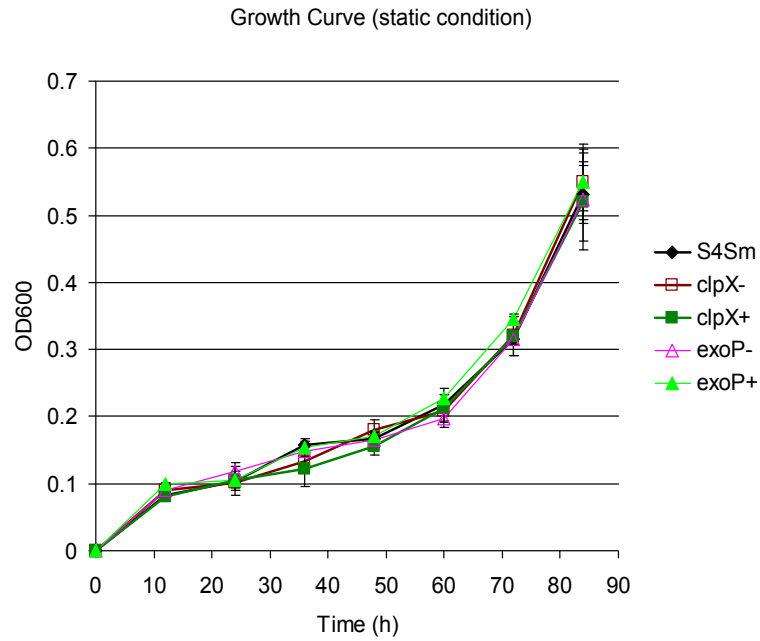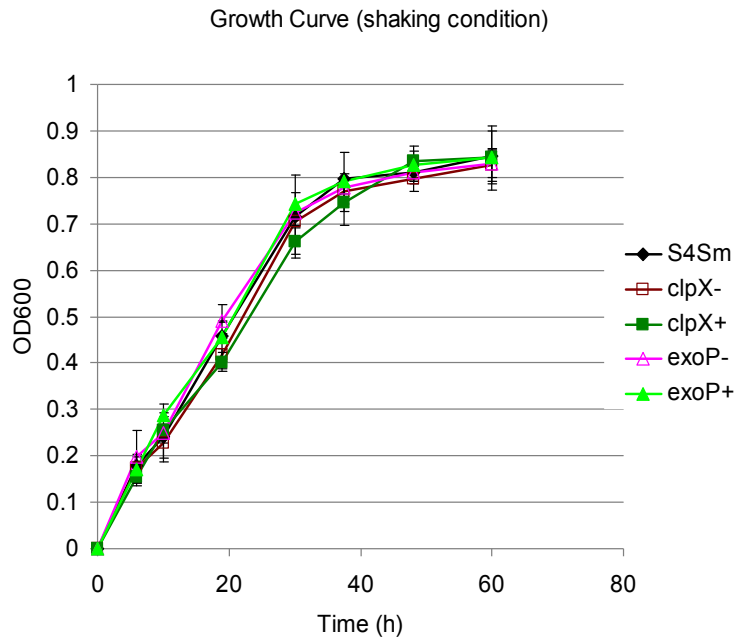

Supplement: 12866_2015_617_MOESM5_ESM.pdf [file 12866_2015_617_MOESM5_ESM.pdf]
