# Supplementary material for: Contributions of tropodithietic acid and biofilm formation to the probiotic activity of Phaeobacter inhibens
Source: PubMed Central journal article supplement (PMC4700733; doi:10.1186/s12866-015-0617-z), 2016-01-05

**Additional File 6.** Effects of *V. anguillarum* NB10 on the growth of *P. gallaeciensis* strains in a competition assay without pre-colonization by *P. gallaeciensis*. The mixed cultures are: S4Sm-OFP with NB10Sm-GFP, *clpX*-OFP with NB10Sm-GFP and *exoP*-OFP with NB10Sm-GFP. Colonization and initial cell densities were as described in the Materials and Methods.

A) Growth of sessile *P. gallaeciensis* cells (with NB10Sm) in a co-culture system and a monoculture control. B) Growth of planktonic *P. gallaeciensis* cells (with NB10Sm) in a co-culture system and a monoculture control. The data presented are average of two independent experiments and each independent experiment has three replicates.

A.

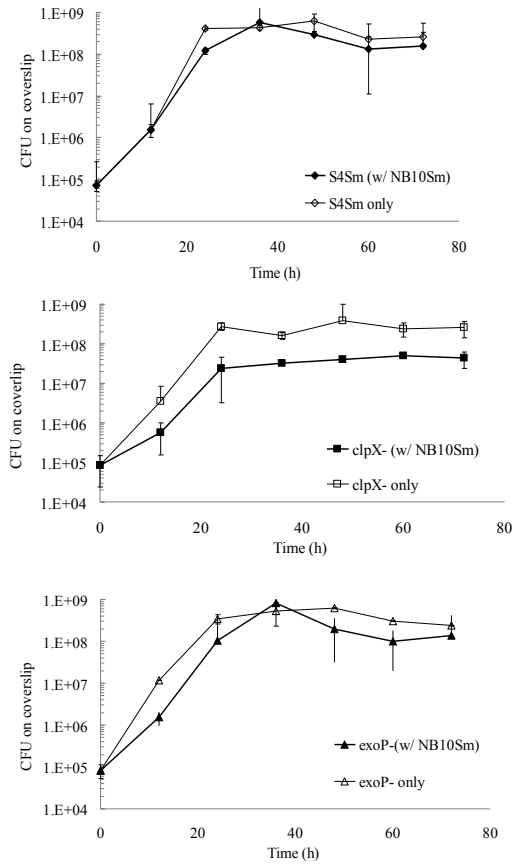

B.

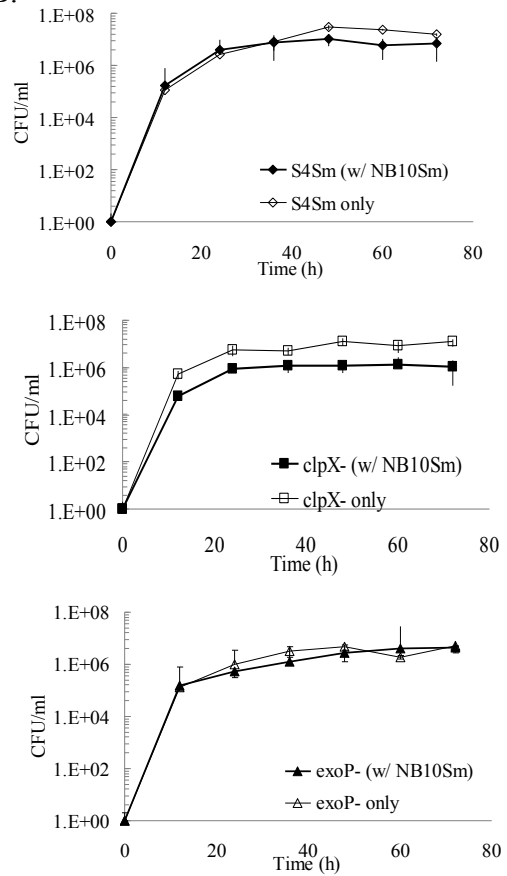

Supplement: 12866_2015_617_MOESM6_ESM.pdf [file 12866_2015_617_MOESM6_ESM.pdf]
