# Supplementary material for: Contributions of tropodithietic acid and biofilm formation to the probiotic activity of Phaeobacter inhibens
Source: PubMed Central journal article supplement (PMC4700733; doi:10.1186/s12866-015-0617-z), 2016-01-05

**Additional File 7.** Competition assay between *Phaeobacter* S4Sm strains and *V. anguillarum* NB10Sm without pre-colonization by *Phaeobacter*. The mixed cultures are S4Sm-OFP with NB10Sm-GFP, *clpX*-OFP with NB10Sm-GFP and *exoP*-OFP with NB10Sm-GFP. A) Single channel and merged confocal microscopy images of mixed biofilm development by OFP-producing strains (S4Sm, *clpX* mutant or *exoP* mutant) and GFP-producing *V. anguillarum* NB10Sm-GFP on the surface of glass coverslip at 48 h. The data presented is from a representative experiment of two independent experiments. B) Growth of sessile NB10Sm in co-culture system with different *Phaeobacter* strains. C) Comparison of growth of sessile *V. anguillarum* (NB10Sm) in different co-culture system and monoculture control. D) Growth of planktonic *V. anguillarum* (NB10Sm) in co-culture system with different *Phaeobacter* strains. E) Comparison of growth of planktonic *V. anguillarum* (NB10Sm) in different co-culture system and monoculture control. The data presented are average of two independent experiments and each independent experiment has three replicates.

A

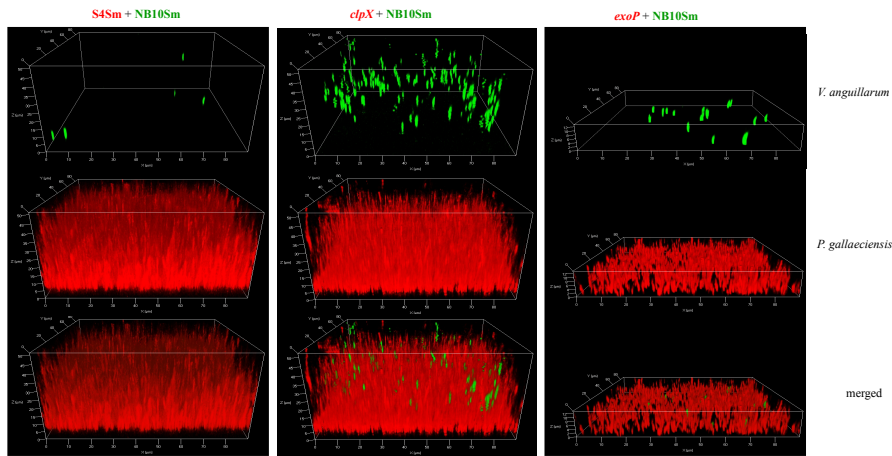

B

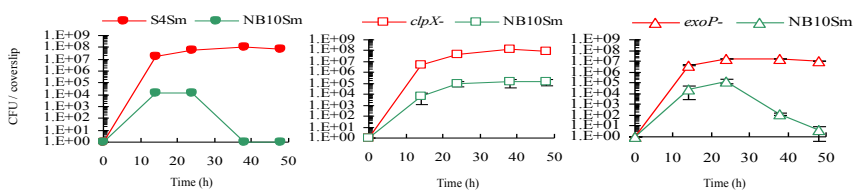

C

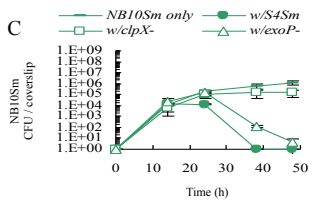

D

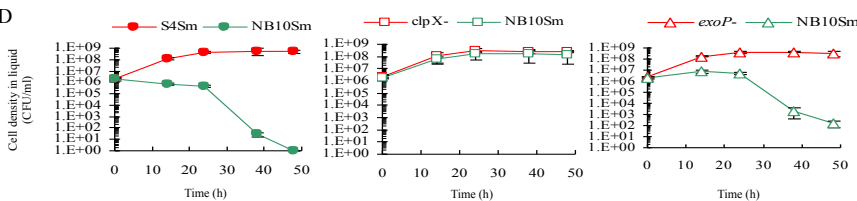

E

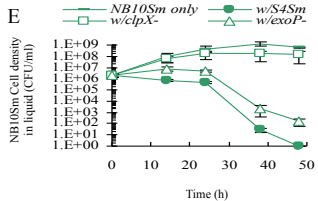

Supplement: 12866_2015_617_MOESM7_ESM.pdf [file 12866_2015_617_MOESM7_ESM.pdf]
